# Supplementary material for: Differential detection of aspartic acid in MCF-7 breast cancer cells
Source: Royal Society of Chemistry journal article supplement (doi:10.1039/d3ob01072d), 2023-01-01
Supplement: d3ob01072d1.pdf [file d3ob01072d1.pdf]

## Supporting Information

# Differential detection of Aspartic acid in MCF-7 breast cancer cells

Priyotosh Ghosh,<sup>a</sup> Tanmoy Das,<sup>b</sup> Ansuman Chattopadhyay,<sup>b</sup> and Prithidipa Sahoo\*<sup>a</sup>

<sup>a</sup>Department of Chemistry, Visva-Bharati University, Santiniketan-731235, India.

<sup>b</sup>Department of Zoology, Visva-Bharati, Santiniketan 731235, West Bengal, India.

\*Corresponding author. Department of Chemistry, Visva-Bharati University, Santiniketan-731235, India

Email: [prithidipa.sahoo@visva-bharati.ac.in](mailto:prithidipa.sahoo@visva-bharati.ac.in)

## CONTENT

## Page no.

|                                                                                                      |      |
|------------------------------------------------------------------------------------------------------|------|
| 1. Performance comparison of existing methods and present method for detection of Aspartic acid..... | 2    |
| 1. NMR and HRMS spectra.....                                                                         | 3-5  |
| 2. Selectivity.....                                                                                  | 6    |
| 3. Optical study and Competitive selectivity in presence of other analytes.....                      | 7    |
| 4. UV-vis fluorescence titration.....                                                                | 7    |
| 5. Evaluation of the association constants for the formation of PCF-Aspartic acid complex.....       | 8    |
| 6. Job's plot.....                                                                                   | 9    |
| 7. Calculation of limit of detection.....                                                            | 9-10 |
| 8. Time-dependent fluorescence spectra of PCF in the presence of Aspartic Acid.....                  | 10   |
| 9. PCF lifetime in presence and absence of aspartic acid.....                                        | 11   |
| 10. Reversibility analysis of PCF.....                                                               | 12   |
| 11. pH titration.....                                                                                | 12   |
| 12. DFT study.....                                                                                   | 13   |
| 13. Cytotoxicity assay.....                                                                          | 14   |

**1. Table S1. Performance comparison of existing methods and present method for detection of Cysteine**

| Analytes                    | Sensor type                              | Detection limit           | Sensitivity and Selectivity | Estimation | Application | References                                   |
|-----------------------------|------------------------------------------|---------------------------|-----------------------------|------------|-------------|----------------------------------------------|
| <b>Aspartic acid</b>        | <b>Carbozole</b>                         | <b>46.1 nM</b>            | <b>High</b>                 | <b>Yes</b> | <b>Yes</b>  | <b>Present manuscript</b>                    |
| Aspartic acid, Glutaic acid | BODIPY                                   | 1 $\mu$ M                 | Moderate                    | No         | Yes         | Dyes Pigm., 2019, 168, 111-122               |
| Aspartic acid               | Methoxysalicylaldehydethiosemicarbazone  | $8.7449 \times 10^{-8}$ M | High                        | No         | Yes         | Inorganica Chimica Acta 530 (2022) 120683    |
| Aspartic acid, Glutaic acid | NIR cyanide fluorescent                  | $10^{-7}$ M               | Moderate                    | No         | Yes         | New J. Chem., 2014, 38, 4791                 |
| Aspartic acid               | Silver ion fabricated lanthanide complex | 0.46 $\mu$ M              | High                        | No         | No          | Sensors and Actuators B 253 (2017) 1006–1011 |

# 1.NMR Studies

## <sup>1</sup>H NMR of PCF in CD<sub>3</sub>CN:

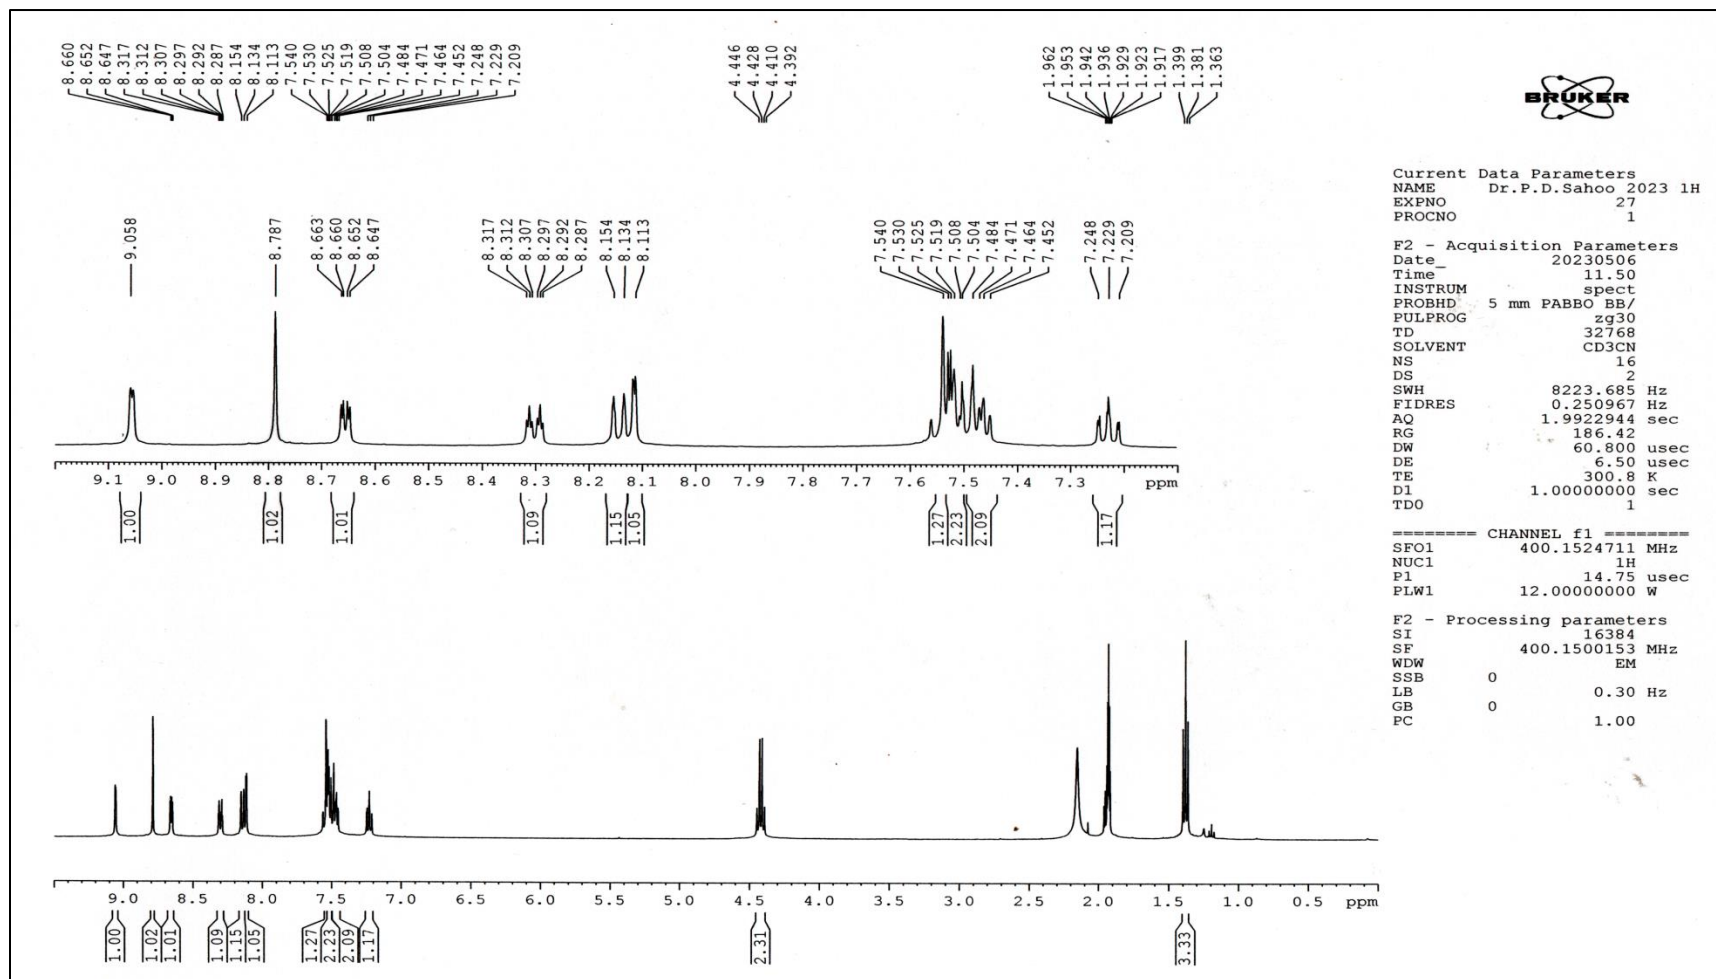

Figure S1. <sup>1</sup>H NMR of PCF in CD<sub>3</sub>CN (400 MHz)

**$^{13}\text{C}$  NMR of PCF in  $\text{CD}_3\text{CN}$ :**

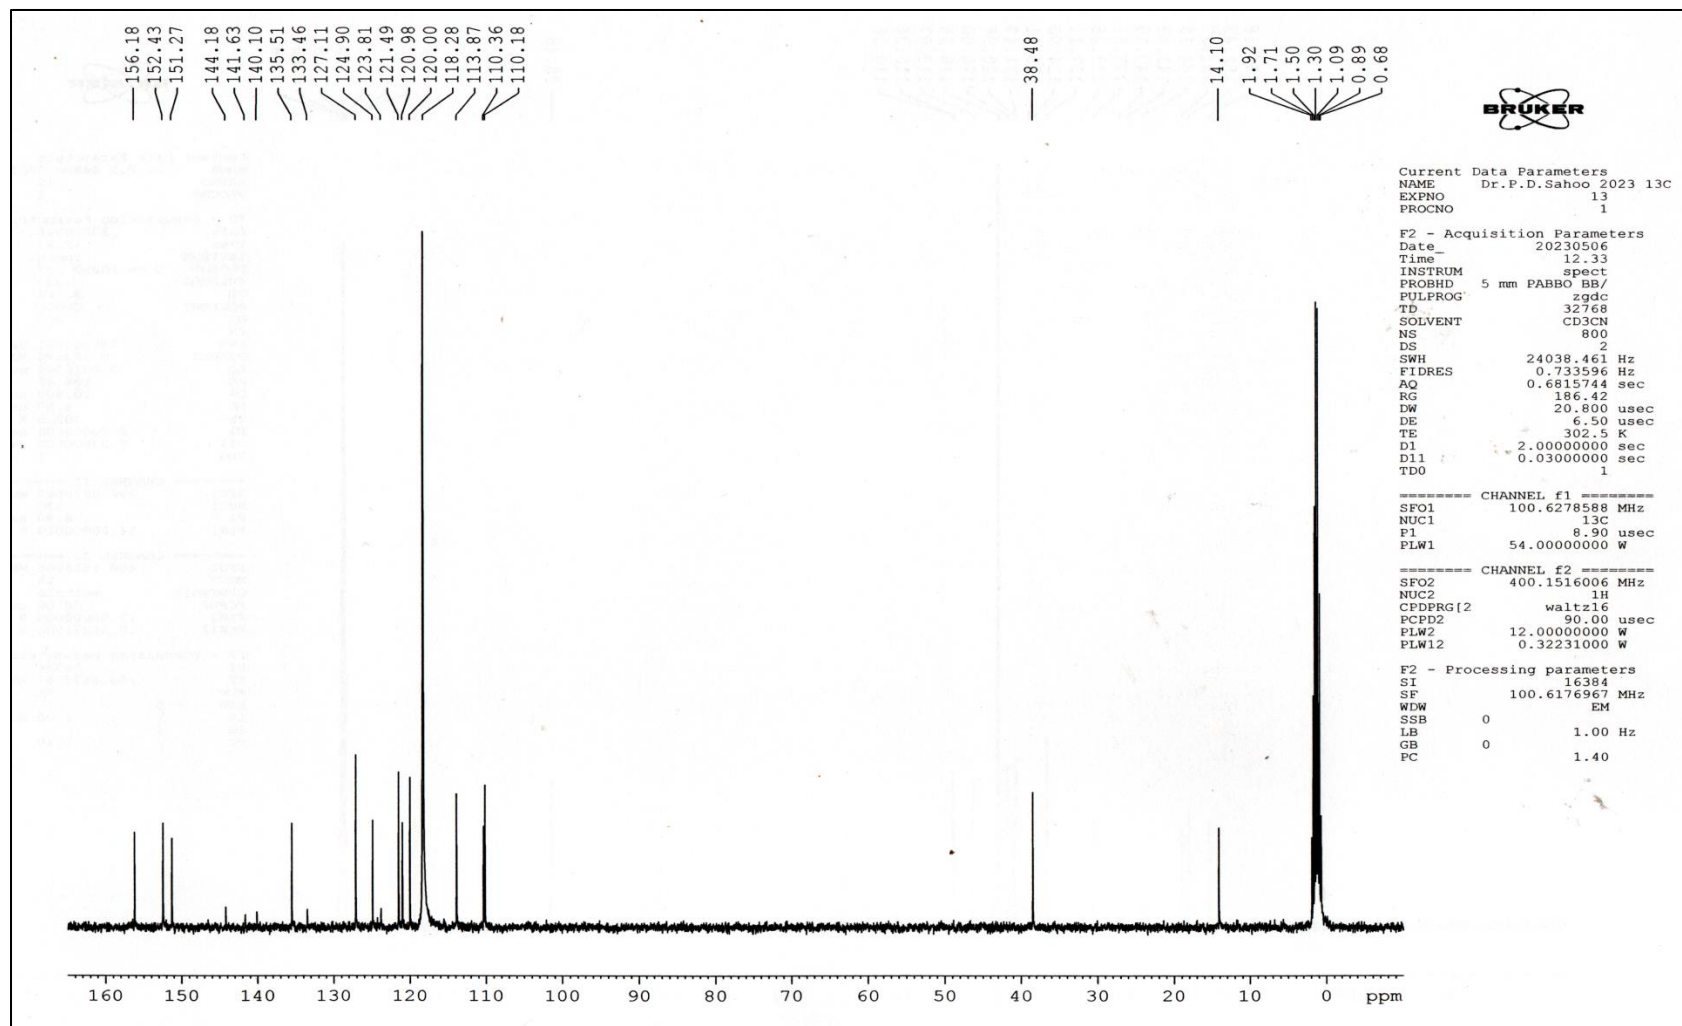

**Figure S2.**  $^{13}\text{C}$  NMR of PCF in  $\text{CD}_3\text{CN}$  (100 MHz).

## 2.Selectivity

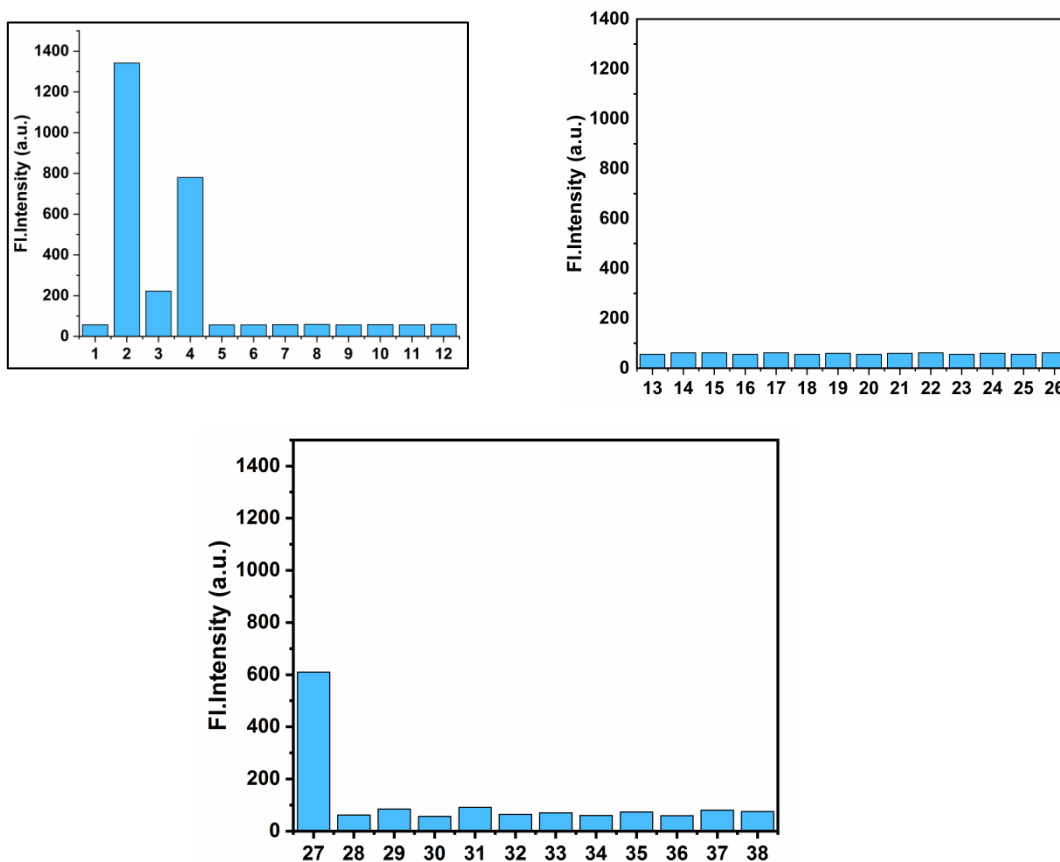

**Figure S3.** Fluorescence spectra of PCF in presence of different analytes at 434 nm ( $\lambda_{ex} = 300$  nm) in  $H_2O-CH_3CN$  (2:1, v/v) at neutral pH. 1) Blank, 2) Aspartic acid, 3) Serine, 4) Glutamic acid, 5) L-proline, 6) Tyrosine, 7) Methionine, 8) Leucine, 9) Lysine, 10) Alanine, 11) Phenyl alanine 12) Histidine 13) Threonine, 14) Valine, 15)  $Zn^{2+}$ , 16)  $Cu^{2+}$ , 17)  $Pb^{2+}$ , 18)  $Mg^{2+}$ , 19)  $Ca^{2+}$ , 21)  $H_2O_2$ , 22)  $Fe^{3+}$ , 23)  $Sn^{2+}$ , 24)  $Al^{3+}$ , 25)  $Na^+$  26)  $K^+$ , 27) cysteine (Cys), 28) glycine (Gly), 29) glutamine (Gln), 30) valine (Val), 31) threonine (Thr), 32) methionine (Met), 33) arginine (Arg), 34) isoleucine (Iso), 35) asparagine (Asn), 36) ornithine (Orn) 37) citrulline (Cit), 38) sarcosine (Sar).

### 3. Optical study and Competitive selectivity in presence of other analytes

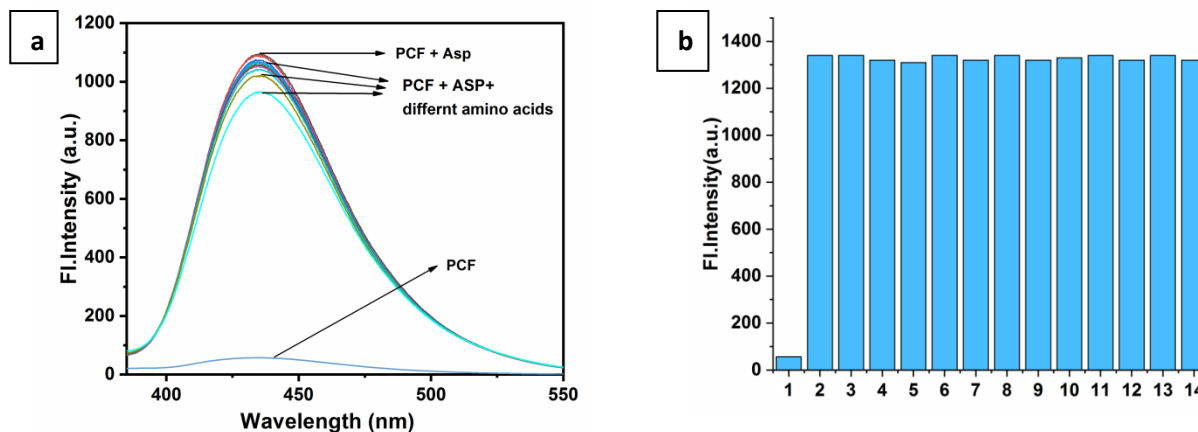

**Figure S4.** (a) Optical study of PCF with aspartic acid then different amino acids ( Ala, Arg, Asn, Cys, Glu, Gln, Gly, His, Leu, Lys, Met, Phe, Pro, Ser, Thr, Trp, Tyr, Val ) (b) Histogram representing competitive fluorescence spectra of **PCF + Aspartic acid** in presence of different analytes at 434 nm ( $\lambda_{ex} = 300$  nm) in H<sub>2</sub>O-CH<sub>3</sub>CN (2:1, v/v) at pH 6.5-6.8. [1] Blank, 2) Aspartic acid, 3) Aspartic acid +Zn<sup>2+</sup>, 4) Aspartic acid +Hg<sup>2+</sup>, 5) Aspartic acid +Pb<sup>2+</sup>, 6) Aspartic acid +Mg<sup>2+</sup>, 7) Aspartic acid +Ca<sup>2+</sup>, 8) Aspartic acid +Na<sup>+</sup>, 9) cysteine +K<sup>+</sup>, 10) Aspartic acid +H<sub>2</sub>O<sub>2</sub>, 11) Aspartic acid +H<sub>2</sub>S, 12) Aspartic acid +Cd<sup>2+</sup>, 13) Aspartic acid +CN<sup>-</sup>, 14) Aspartic acid +NO<sub>3</sub><sup>-</sup>]

### 4. UV-vis and fluorescence titration studies

#### UV-vis spectral studies:

A stock solution of **PCF**  $1 \times 10^{-5}$  M was prepared in water-acetonitrile (2:1, v/v). **Aspartic acid** solution of concentration  $1 \times 10^{-4}$  M was prepared in Millipore water. All experiments were carried out in an aqueous medium at pH 6.5-6.8. During the titration, each time a  $1 \times 10^{-5}$  M solution of **PCF** was filled in a quartz optical cell of 1 cm optical path length and **Aspartic acid** stock solution was added into the quartz optical cell gradually by using a micropipette.

#### Fluorescence spectral studies:

A stock solution of **PCF**  $1 \times 10^{-5}$  M was prepared in water-acetonitrile (2:1, v/v). **Aspartic acid** solution of concentration  $1 \times 10^{-4}$  M was prepared in Millipore water. All experiments were carried out in aqueous medium at pH 6.5-6.8. During titration, each time a  $1 \times 10^{-5}$  M solution of **PCF** was filled in a quartz optical cell of 1 cm optical path length and **Aspartic acid** stock solution was added into the quartz optical cell gradually by using a micropipette. For all fluorescence measurements, excitations were provided at 300 nm, and emissions were collected from 390 to 550 nm.

## 5. Evaluation of the association constants for the formation of PCF-Aspartic acid complex:

### By Fluorescence Method:

Binding constant of the chemosensor **PCF** was calculated through emission method by using the following equation:

$$1/(I - I_0) = 1/K(I_{\max} - I_0) [G] + 1/(I_{\max} - I_0) \dots\dots\dots(ii)$$

Where  $I_0$ ,  $I_{\max}$ , and  $I$  represent the emission intensity of free **PCF**, the maximum emission intensity observed in the presence of added **Aspartic acid** at 434 nm ( $\lambda_{\text{ex}} = 300$  nm),  $[G]$  is the concentration of the guest **Aspartic acid** and the emission intensity at a certain concentration of the **Aspartic acid**, respectively.  $[H]$  is the concentration of the host **PCF**.

### Binding constant calculation graph (Fluorescence method):

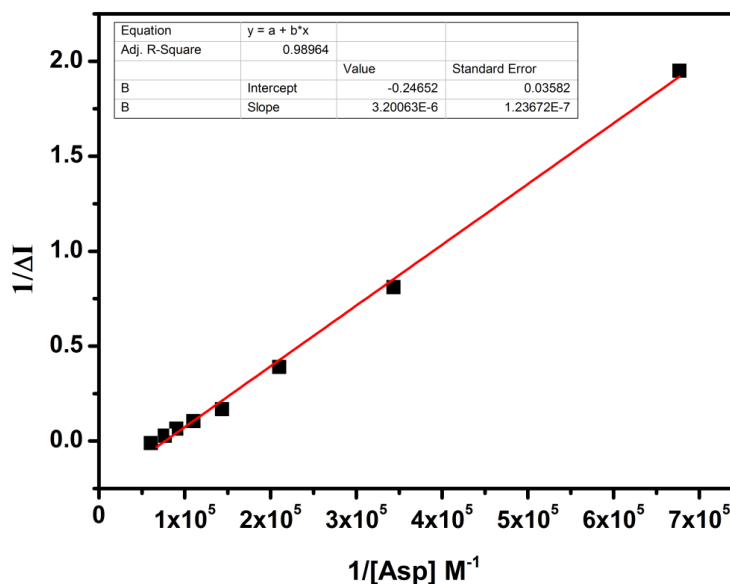

**Fig. S5.** Linear regression analysis ( $1/[G]$  vs  $1/\Delta I$ ) for the calculation of association constant value by fluorescence titration method.

The association const. ( $K_a$ ) of **PCF** for sensing **Aspartic acid** was determined from the equation:  $K_a = \text{intercept}/\text{slope}$ . From the linear fit graph, we get intercept = 0.24652, slope =  $3.20063 \times 10^{-6}$ . Thus, we get,  $K_a = 0.24652 / (3.20063 \times 10^{-6}) = 7.7 \times 10^4 \text{M}^{-1}$ .

## 6. Job's plot

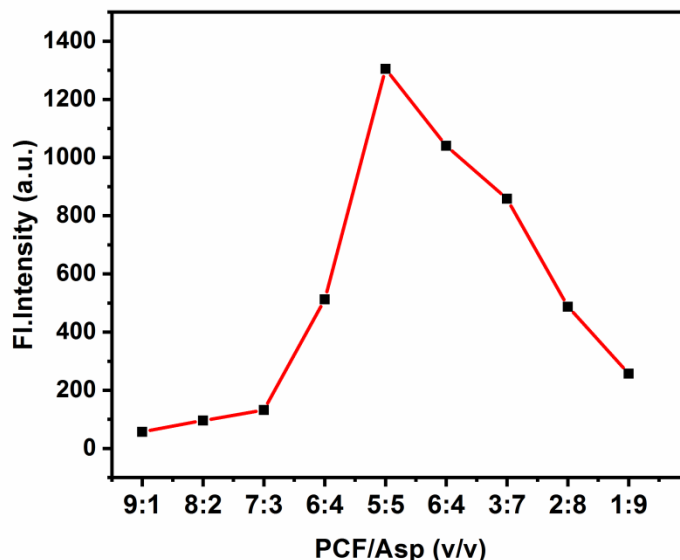

**Figure S6.** Job's plot of **PCF**(10 $\mu$ M) with **Aspartic acid** in acetonitrile-water (1:2, v/v), at neutral pH, by fluorescence method, which indicate 1:1 stoichiometry for **PCF** with **Aspartic acid**. Standard deviations are represented by error bar (n=3).

## 7. Calculation of limit of detection (LOD) of PCF with Aspartic acid:

The detection limit of the chemosensor **PCF** for **Aspartic acid** was calculated on the basis of fluorescence titration. To determine the standard deviation for the fluorescence intensity, the emission intensity of four individual receptors without **Aspartic acid** was measured by 10 times and the standard deviation of blank measurements was calculated.

The limit of detection (LOD) of **PCF** for sensing **Aspartic acid** was determined from the following equation<sup>2-3</sup>:

$$\text{LOD} = K \times \text{SD}/S$$

Where K = 2 or 3 (we take 3 in this case); SD is the standard deviation of the blank receptor solution; S is the slope of the calibration curve.



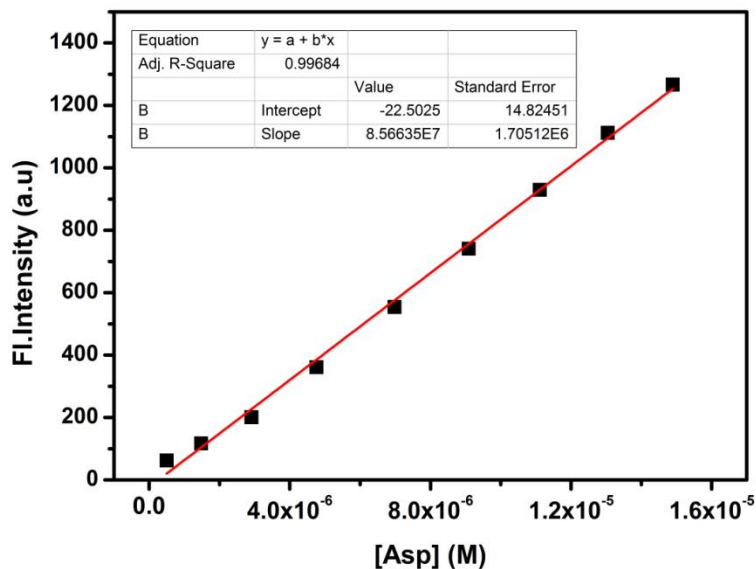

**Figure S7.** Linear fit curve of **PCF** at 434 nm with respect to **Aspartic acid** concentration

For **PCF** with **Aspartic acid**:

From the linear fit graph, we get slope =  $8.56635 \times 10^7$ , and SD value is 1.3189665.

Thus, using the above formula, we get the Limit of Detection =  $4.61 \times 10^{-8}$ M. Therefore, **PCF** can detect **Aspartic acid** up to this very lower concentration by fluorescence technique.

## 8. Time-dependent fluorescence spectra of PCF in the presence of Aspartic acid

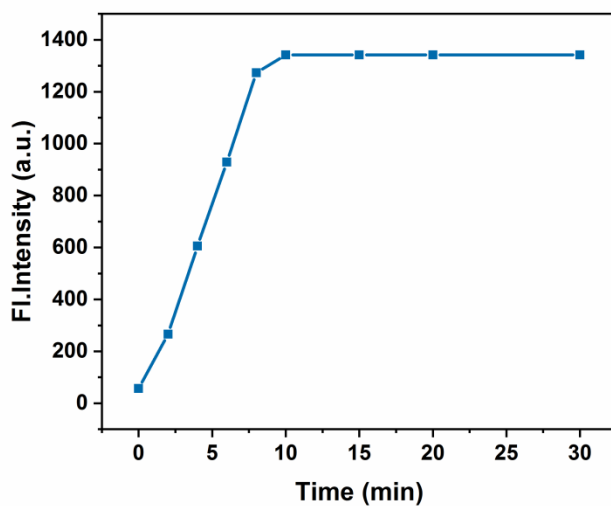

**Figure S8.** Time-dependent fluorescence spectra of **PCF** in the presence of **Aspartic acid**.

## 9. PCF lifetime in presence and absence of aspartic acid

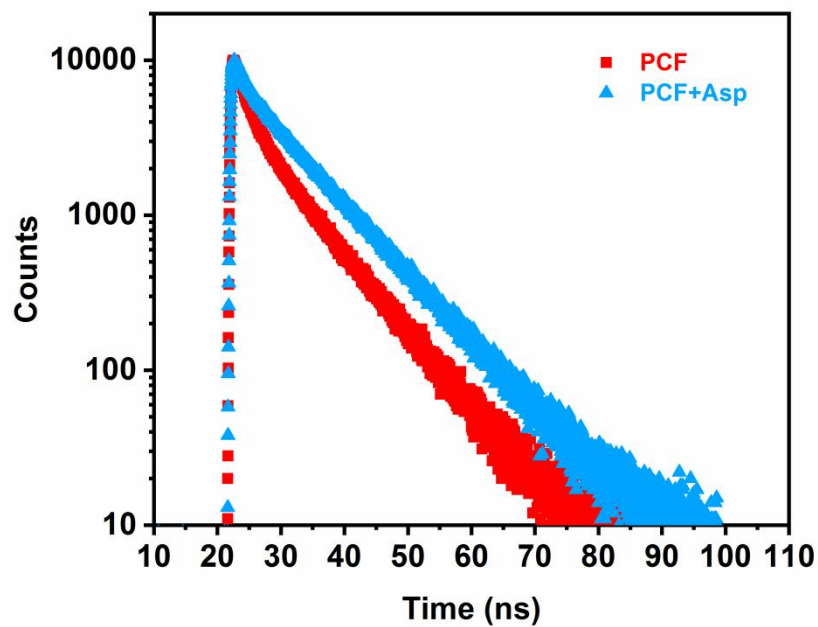

**Figure S9.** PCF lifetime in presence and absence of aspartic acid

**Table S2.** Decay time components of PCF and PCF + Asp

| System    | $b_1$    | $\tau_1$ | $b_2$    | $\tau_2$ | $\langle \tau \rangle = b_1 \tau_1 + b_2 \tau_2$ |
|-----------|----------|----------|----------|----------|--------------------------------------------------|
| PCF       | 0.430738 | 5.42E-01 | 0.029351 | 1.75E+00 | 0.28 ns                                          |
| PCF + Asp | 0.280081 | 1.45E-01 | 0.449727 | 5.48E+00 | 2.50 ns                                          |

## 10. Reversibility analysis of PCF

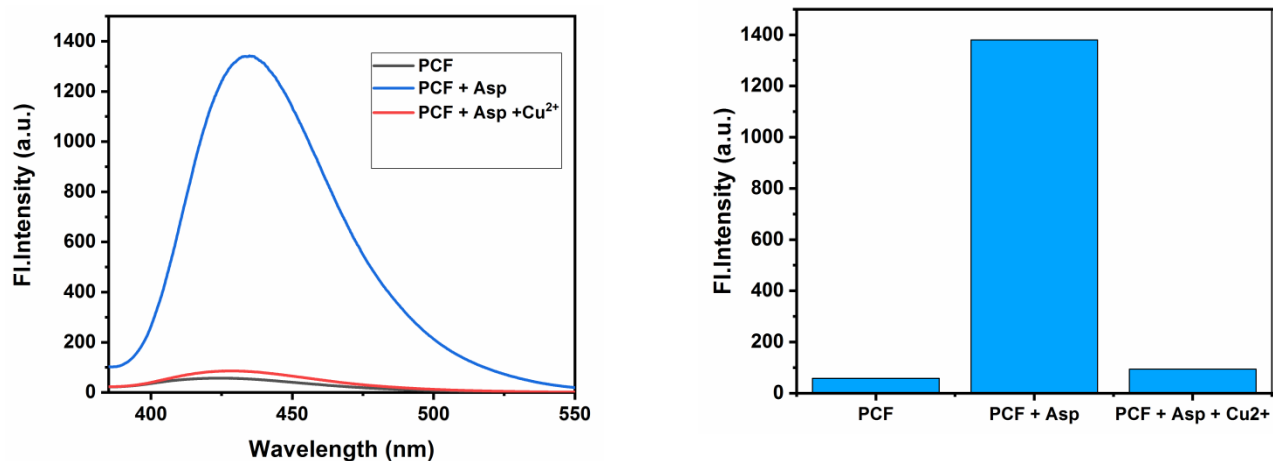

**Figure S10.** Reversibility analysis of PCF ( $10^{-5}$  M) with Aspartic acid ( $10^{-4}$  M) in presence of  $\text{Cu}^{2+}$  ( $10^{-4}$  M).

## 11. pH titration study:

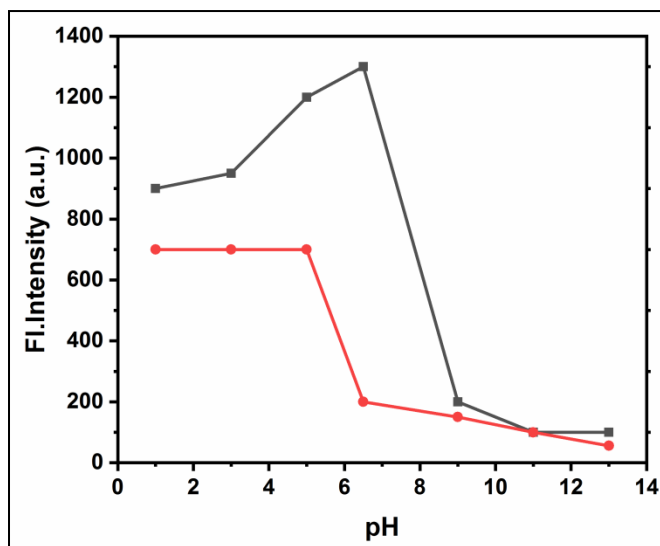

**Figure S11.** Effect of pH on the fluorescence intensity of PCF ( $10^{-5}$  M) in the absence of Aspartic acid (red line) and in the presence of Aspartic acid ( $10^{-4}$  M, black line).

## 12. DFT study

**Table S3. Details of the geometry optimization in Gaussian 09 program**

| Details              | PCF         | Aspartic acid | PCF 1       |
|----------------------|-------------|---------------|-------------|
| Calculation method   | B3LYP       | B3LYP         | B3LYP       |
| Basis set            | 6-31G (d,p) | 6-31G (d,p)   | 6-31G (d,p) |
| E(CAM-B3LYP) (a.u.)  | -936.66     | -512.32       | -1449.00    |
| Charge, Multiplicity | 0, 1        | 0, 1          | 0, 1        |
| Solvent (CPCM)       | Water       | Water         | Water       |

## TDDFT- Calculations

**Table S4.** Selected electronic excitation energies (eV), oscillator strengths (f), main configurations of the low-lying excited states of PCF. The data were calculated by TDDFT//B3LYP/6-31G(d,p) based on the optimized ground state geometries.

| Molecules    | Electronic Transition           | Excitation Energy <sup>a</sup> | f <sup>b</sup> | Composition <sup>c</sup> (%) |
|--------------|---------------------------------|--------------------------------|----------------|------------------------------|
| <b>PCF</b>   | S <sub>0</sub> → S <sub>1</sub> | 3.2237 eV 384.60 nm            | 0.5287         | H → L (69.1%)                |
| <b>PCF 1</b> | S <sub>0</sub> → S <sub>1</sub> | 3.0716eV 403 nm                | 0.4055         | H → L (70 %)                 |

<sup>a</sup>Only selected excited states were considered. The numbers in parentheses are the excitation energy in wavelength. <sup>b</sup>Oscillator strength. <sup>c</sup>H stands for HOMO and L stands for LUMO.

**Table S5.** Energies of the highest occupied molecular orbital (HOMO) and lowest unoccupied molecular orbital (LUMO)

| Species      | E <sub>HOMO</sub> (a.u.) | E <sub>LUMO</sub> (a.u.) | ΔE(a.u.) | ΔE(eV) | ΔE(kcal/mol) |
|--------------|--------------------------|--------------------------|----------|--------|--------------|
| <b>PCF</b>   | -0.19252                 | -0.05946                 | 0.14459  | 3.22   | 74.25        |
| <b>PCF 1</b> | -0.20149                 | -0.07434                 | 0.14563  | 3.07   | 70.80        |

### 13. Cytotoxicity assay

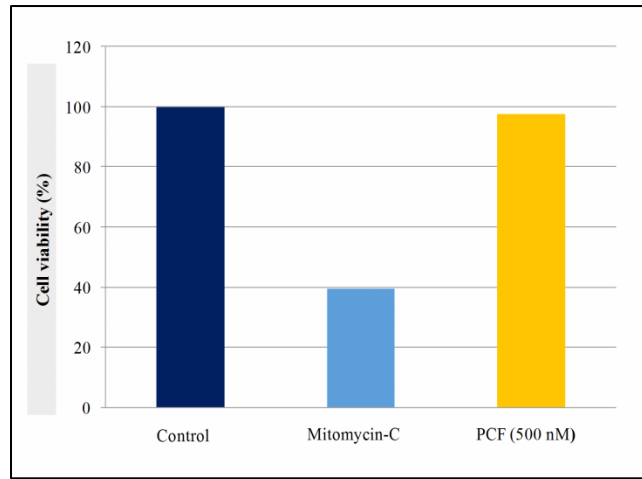

**Figure S12.** MTT assay is to determine the cytotoxic effect of PCF at 500 nM concentration on MCF-7 cells. Untreated control cells and Mitomycin-C treated cells are kept as negative and positive control respectively.
